# Supplementary material for: Preclinical Evidence of Progesterone as a New Pharmacological Strategy in Human Adrenocortical Carcinoma Cell Lines
Source: MDPI journal article supplement (doi:10.3390/ijms24076829), 2023-04-06
Supplement: s1 [file s1]

### **Pg toxicity on wild-type (AB) strain zebrafish embryos.**

Preliminary experiments were conducted to evaluate the Pg toxicity on wild-type (AB) strain zebrafish embryos. Doses higher than 25  $\mu\text{M}$  caused 100% mortality. Exposure to 25  $\mu\text{M}$  Pg was not lethal, but nearly 50% of embryos developed pericardial edema and yolk sac edema (Supplementary Figure 5) while 10  $\mu\text{M}$  Pg was a safe dose.

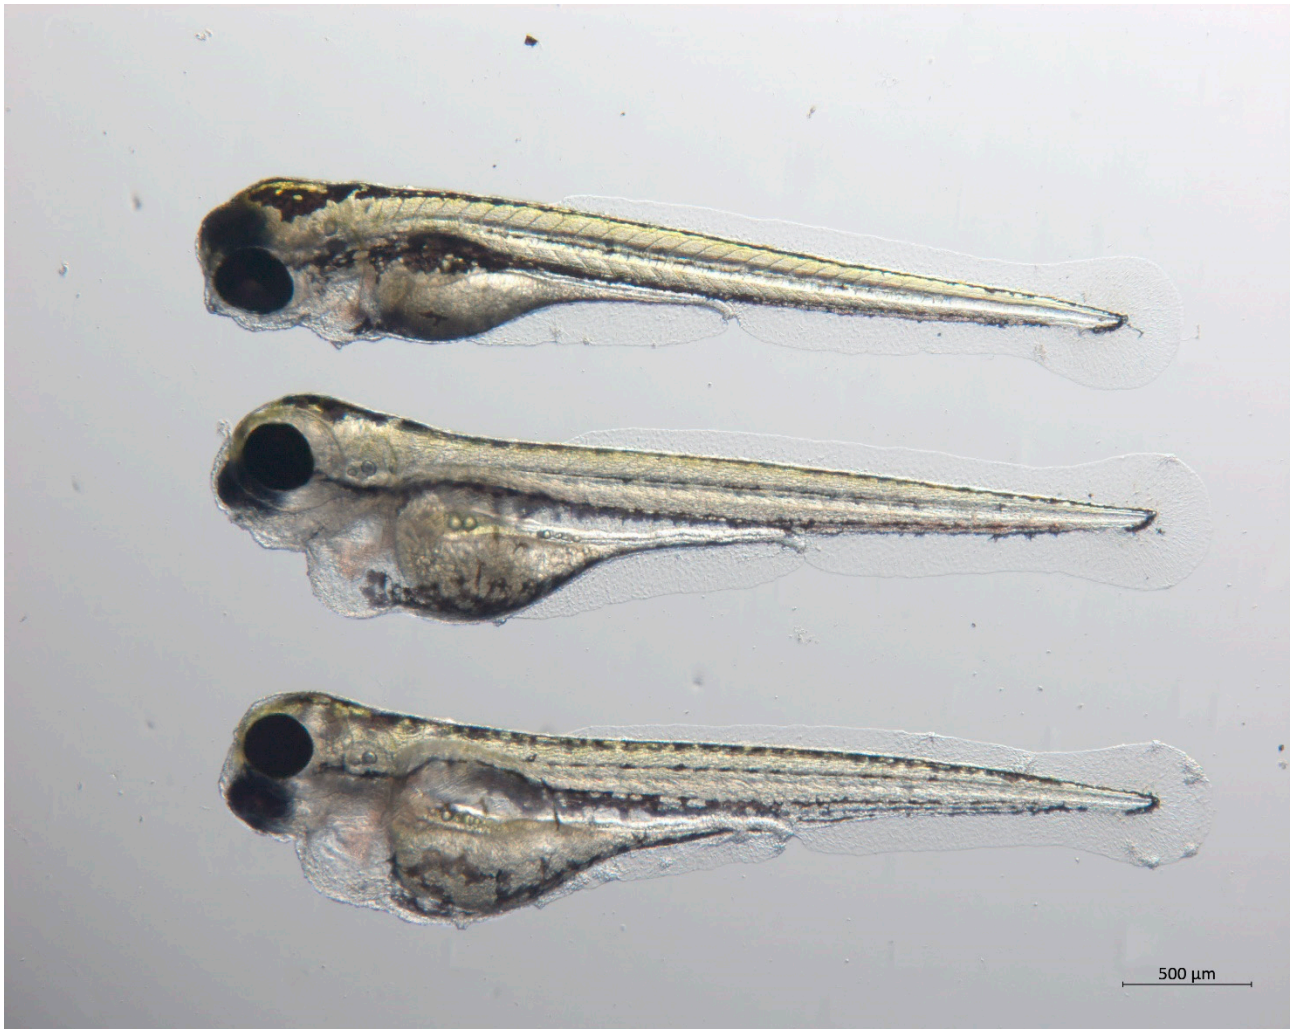

**Supplementary Figure S1.** Representative, lateral-view, picture of 120 hpf wild-type (AB) strain zebrafish embryos treated with 25  $\mu\text{M}$  of Pg. Different entities of pericardial edema and yolk sac edema were shown. A picture has been acquired using a Zeiss Axiozoom V13 microscope with white light at 10x magnification.

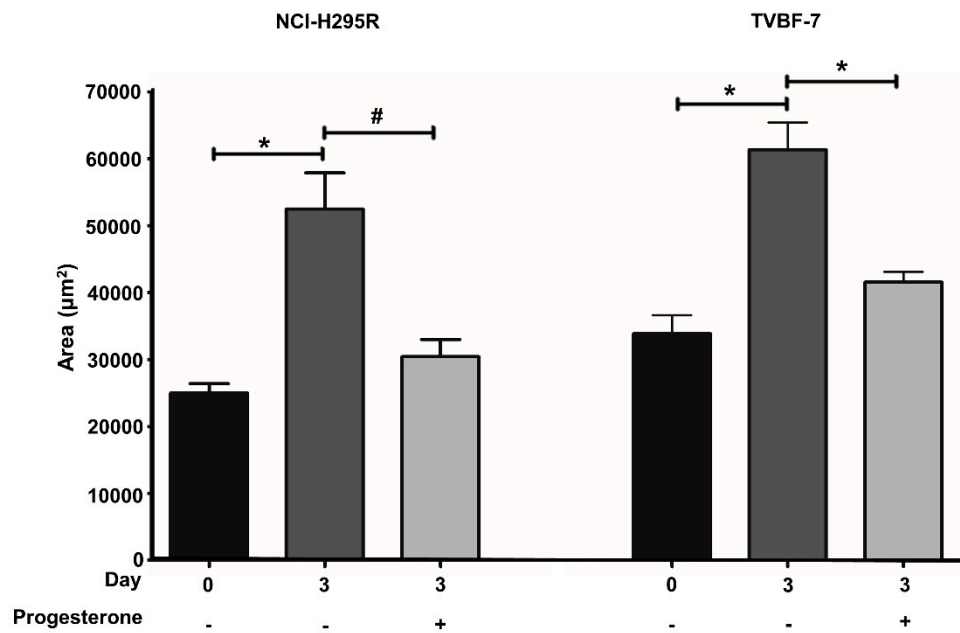

**Supplementary Figure S2. Pg induced a reduction of the tumor xenograft area of NCI-H295R and TVBF-7 cells.** Tumor areas of 48 hpf (T0 – the start of treatment) and 120 hpf (T3 – end of treatment) of vehicle-treated and 12,5 µM Pg-treated embryos xenografted with NCI-H295R or TVBF-7 cells. Data are shown as mean of independent experiments  $\pm$  SEM. \* $p < 0.0001$ ; #  $p < 0.001$ .

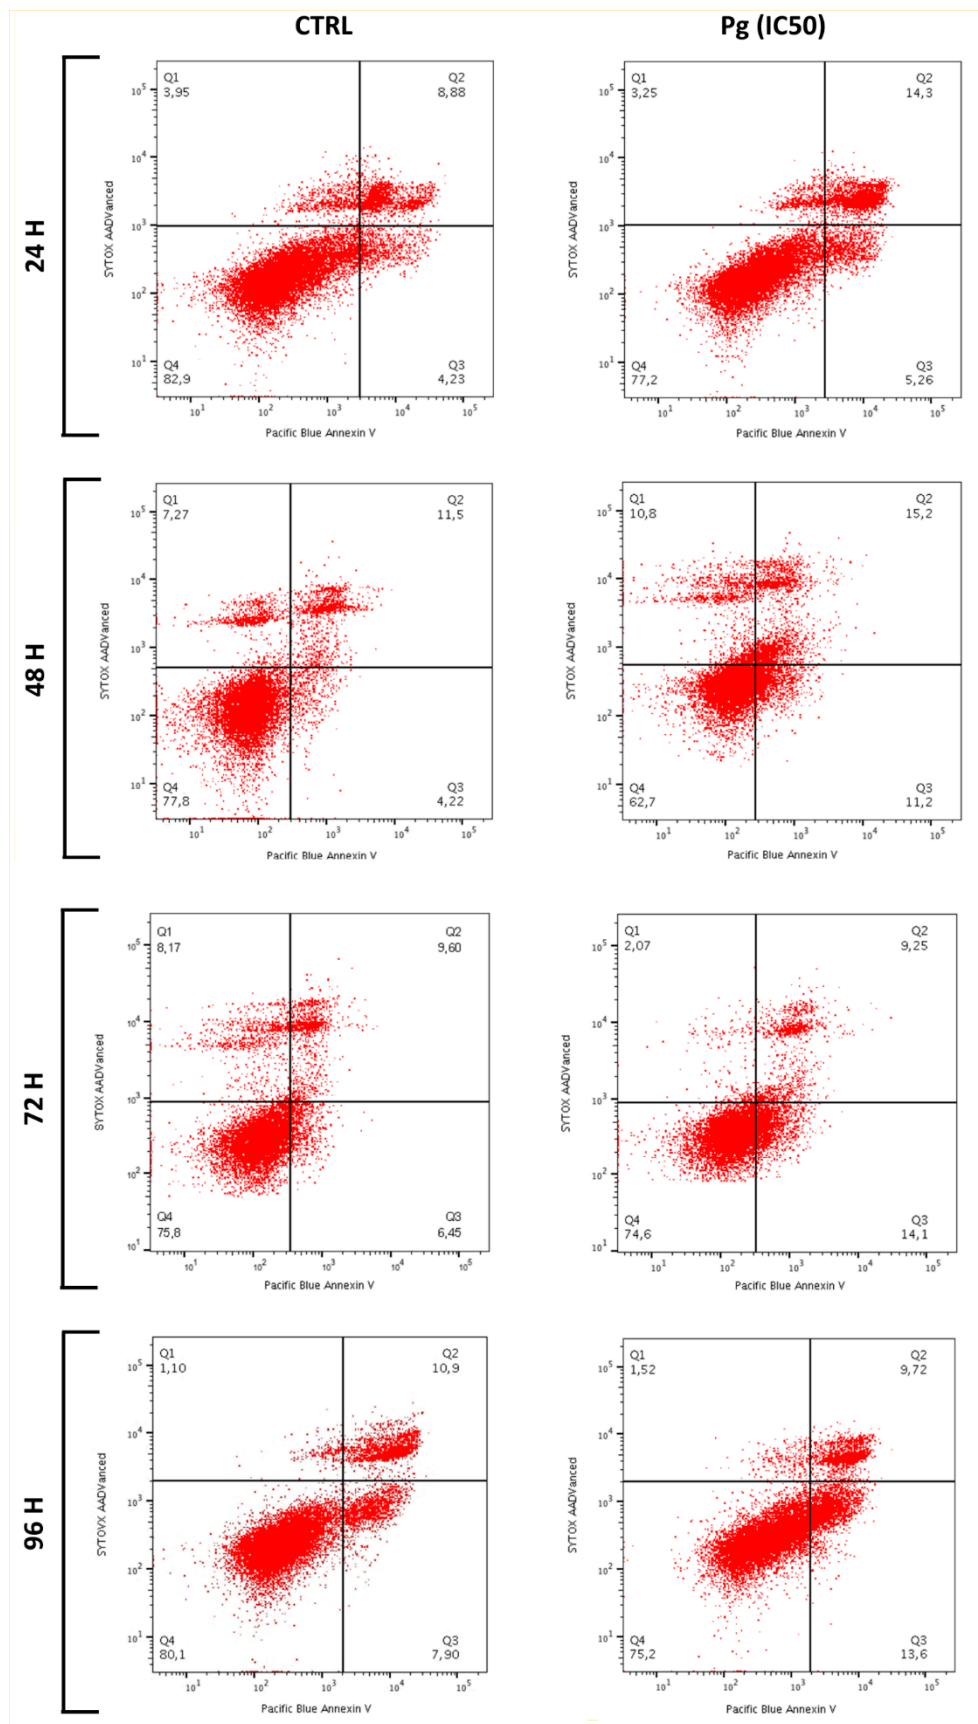

**Supplementary Figure S3.** Representative images of cell apoptosis in NCI-H295R cells after 24, 48, 72 and 96 hours of treatment with Pg. Alive cells are shown in the lower left part of the panel (Q4); early apoptotic cells are shown in the lower right part of the panel (Q3); late apoptotic cells

are shown in the higher right part of the panel (Q2); necrotic cells are shown in the higher left part of the panel(Q1).

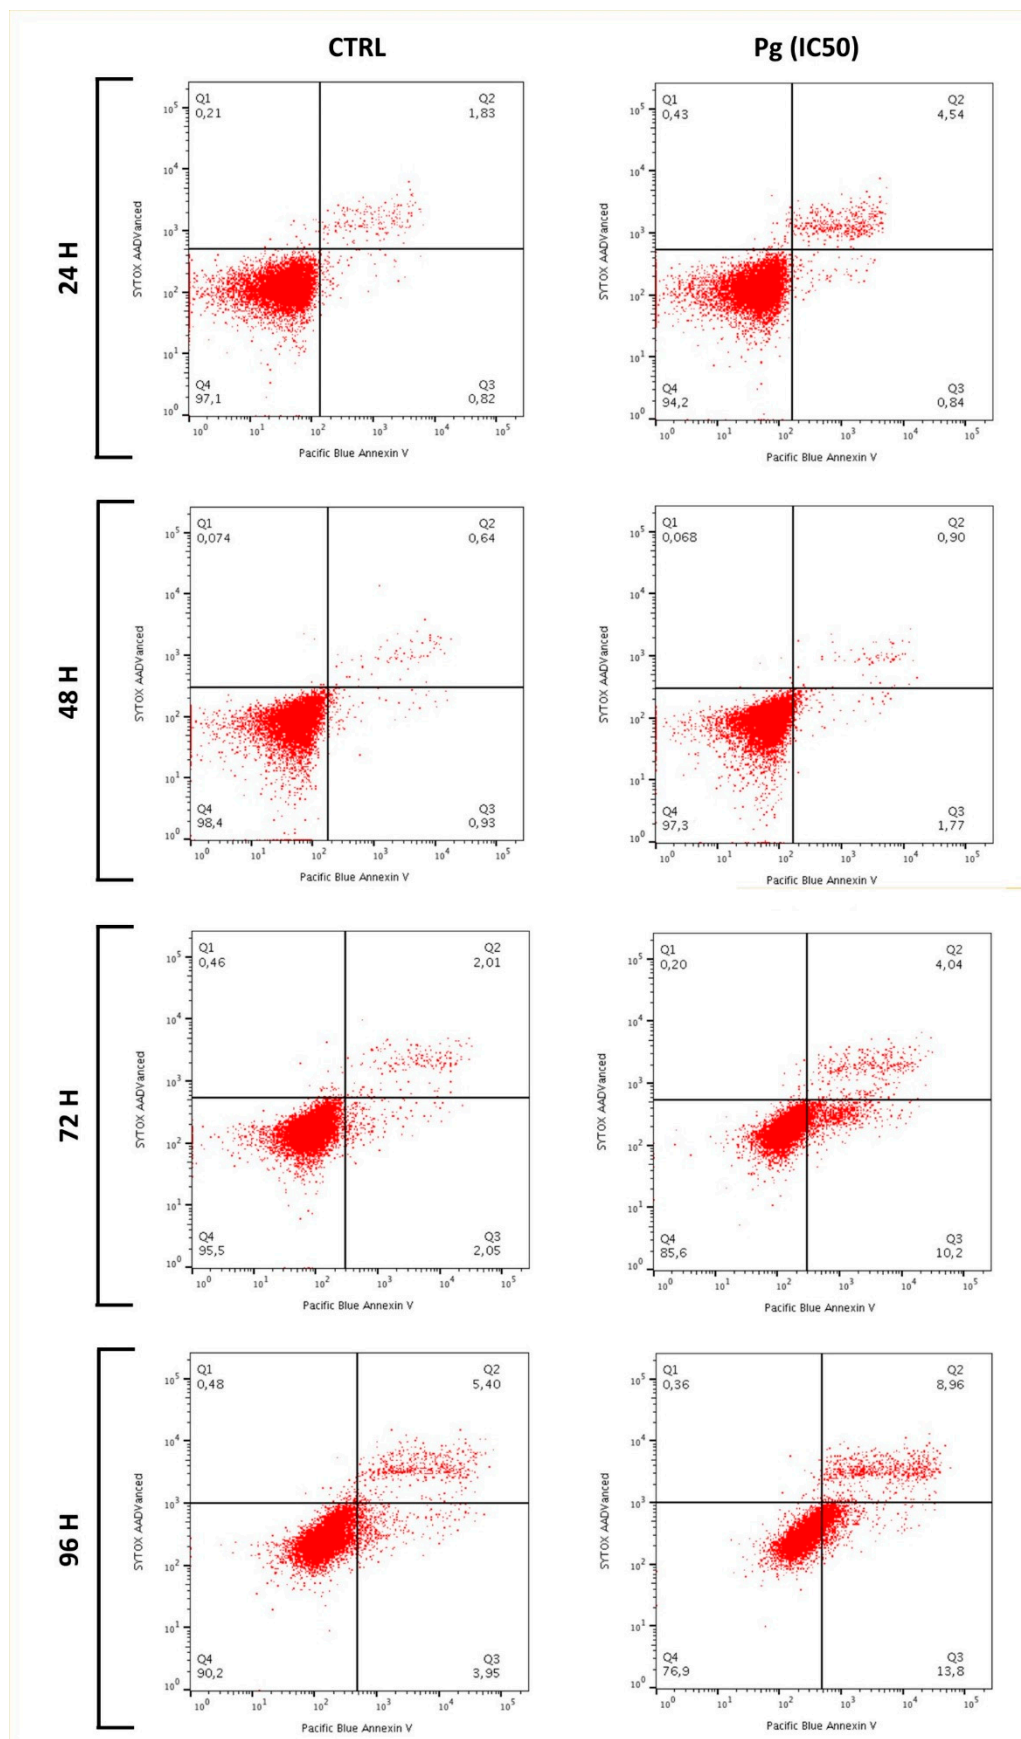

**Supplementary Figure S4.** Representative images of cell apoptosis in MUC-1 cells after 24, 48, 72 and 96 hours of treatment with Pg. Alive cells are shown in the lower left part of the panel (Q4); early apoptotic cells are shown in the lower right part of the panel (Q3); late apoptotic cells are

shown in the higher right part of the panel (Q2); necrotic cells are shown in the higher left part of the panel(Q1).

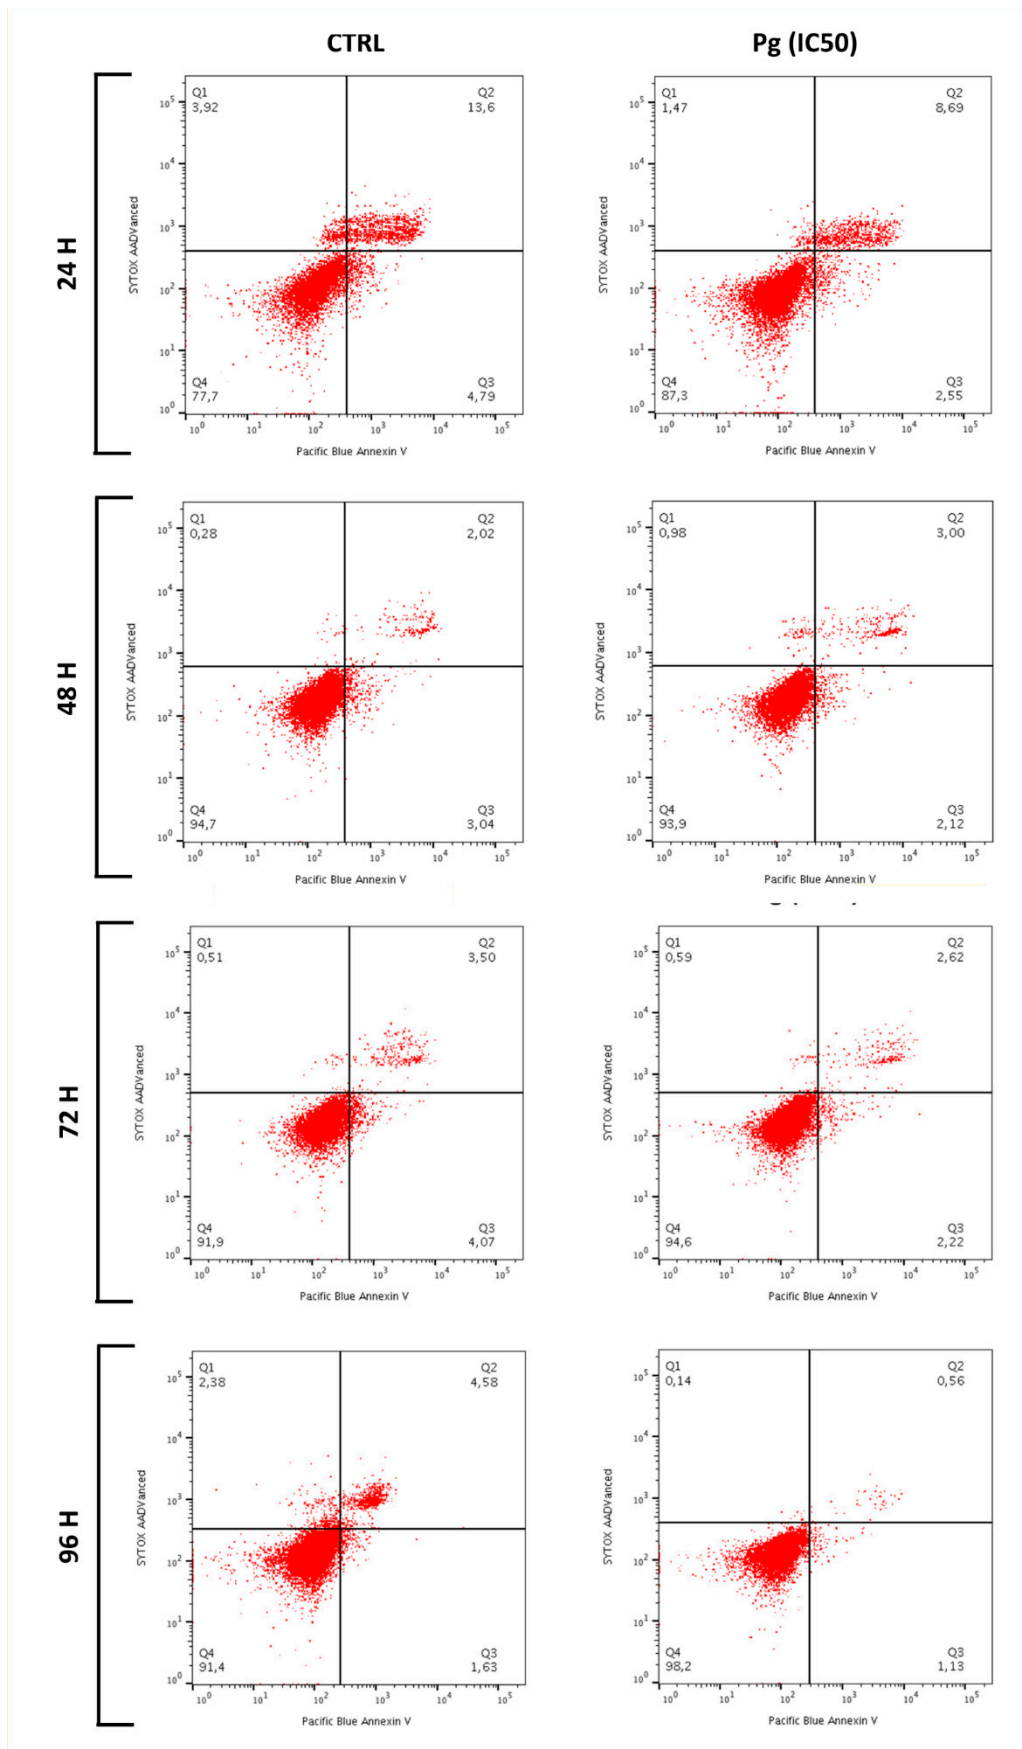

**Supplementary Figure S5.** Representative images of cell apoptosis in TVBF-7 cells after 24, 48, 72 and 96 hours of treatment with Pg. Alive cells are shown in the lower left part of the panel (Q4); early apoptotic cells are shown in the lower right part of the panel (Q3); late apoptotic cells are



shown in the higher right part of the panel (Q2); necrotic cells are shown in the higher left part of the panel(Q1).

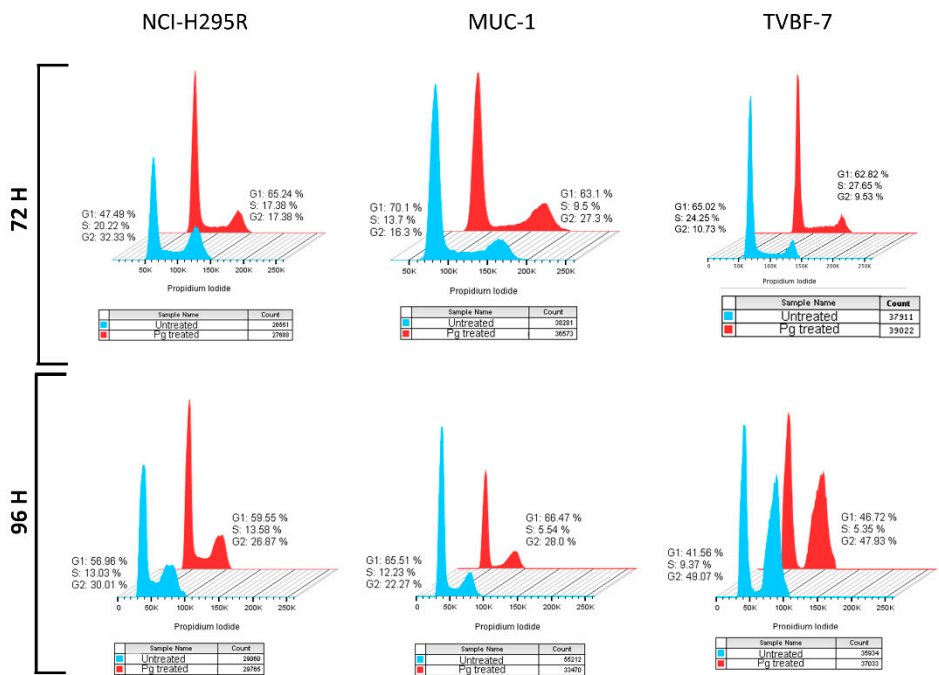

**Supplementary Figure S6.** Cell cycle analysis after Pg-treatment. Representative DNA histograms of NCI-H295R, MUC-1 and TVBF-7 untreated cells and 72h and 96h Pg-treated cells.

**Supplementary Table S1.** MMPs gene expression in ACC cell lines

|             | NCI-H295R    | MUC-1       | TVBF-7       |
|-------------|--------------|-------------|--------------|
| MMP10       | 14,96        | 14,56       | 16,34        |
| MMP11       | 11,70        | 10,12       | 15,08        |
| MMP13       | 17,78        | 11,81       | 18,68        |
| <b>MMP2</b> | <b>10,71</b> | <b>7,19</b> | <b>7,71</b>  |
| MMP3        | 14,73        | 15,28       | 14,62        |
| MMP7        | 19,48        | 12,06       | Undetermined |
| MMP9        | 10,77        | 10,16       | 11,37        |

Values were reported as  $\Delta C_t$ , which are differences of the threshold cycle ( $C_t$ ) values between the gene of interest and the  $\beta$ -actin housekeeping gene, calculated, as described in Materials and Methods.



**Supplementary Table S2.** Evaluation of the gene expression of MMP2 and its inhibitors in ACC cell lines.

| Target gene | Basal expression levels |           |           | Expression levels after Pg-treatment |           |           |
|-------------|-------------------------|-----------|-----------|--------------------------------------|-----------|-----------|
|             | NCI-H295R               | MUC-1     | TVBF-7    | NCI-H295R                            | MUC-1     | TVBF-7    |
| MMP2        | 11.01±0.48              | 7.74±0.1  | 7.47±0.1  | 11.14±0.17                           | 8.41±0.07 | 7.55±0.05 |
| TIMP1       | 5.98 ±0.32              | 7.74±0.09 | 6.80±0.22 | 5.59±0.17                            | 8.41±0.08 | 6.80±0.28 |
| TIMP2       | 5.44±0.28               | 2.52±0.16 | 9.24±0.06 | 4.77±0.22                            | 2.35±0.14 | 8.95±0.03 |

Values were reported as  $\Delta C_t$  that are differences of the threshold cycle ( $C_t$ ) values between the  $\beta$ -actin housekeeping gene and the gene of interest ( $\Delta C_t$ ), calculated, as described in Materials and Methods.
